# Supplementary material for: Calcifying Bacteria Flexibility in Induction of CaCO3 Mineralization
Source: Life (Basel). 2020 Nov 28;10(12):317. doi: 10.3390/life10120317 (PMC7759876; doi:10.3390/life10120317)
Supplement: Supplementary file 1 [file life-10-00317-s001.pdf]

Supplemental materials

# Calcifying Bacteria Flexibility in Induction of $\text{CaCO}_3$ Mineralization

Darya A. Golovkina<sup>1,2</sup>, Elena V. Zhurishkina<sup>1,2</sup>, Lyubov A. Ivanova<sup>1,2</sup>, Alexander E. Baranchikov<sup>3</sup>, Alexey Ye. Sokolov<sup>1</sup>, Kirill S. Bobrov<sup>1,2</sup>, Alexey E. Masharsky<sup>4</sup>, Natalia V. Tsvigun<sup>5</sup>, Gennady P. Kopitsa<sup>1</sup>, Anna A. Kulminskaya<sup>1,2\*</sup>

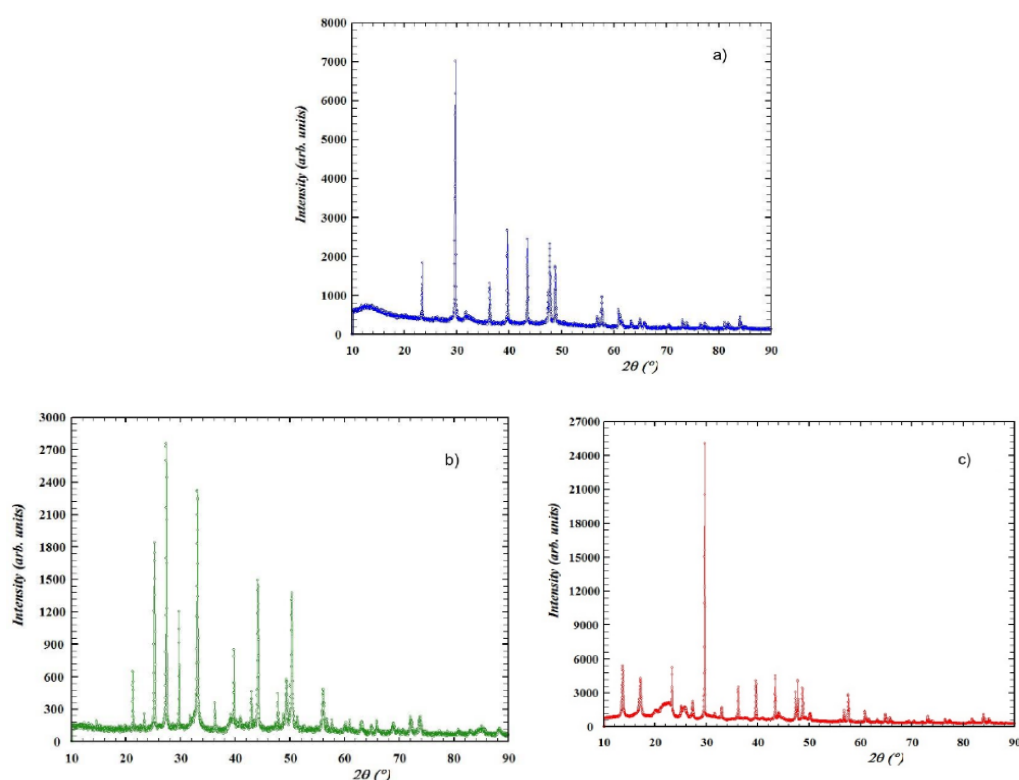

**Figure S1.** Typical x-ray diffraction patterns of  $\text{CaCO}_3$  precipitates formed by representative bacterial strains under study: (a) *B. subtilis* K51 after the growth in B4-U (calcite), (b) *B. cereus* 4b after the growth in B4-AC (calcite + vaterite), (c) *M. luteus* 6 after the growth in B4-AC (calcite + vaterite + not identified phase).

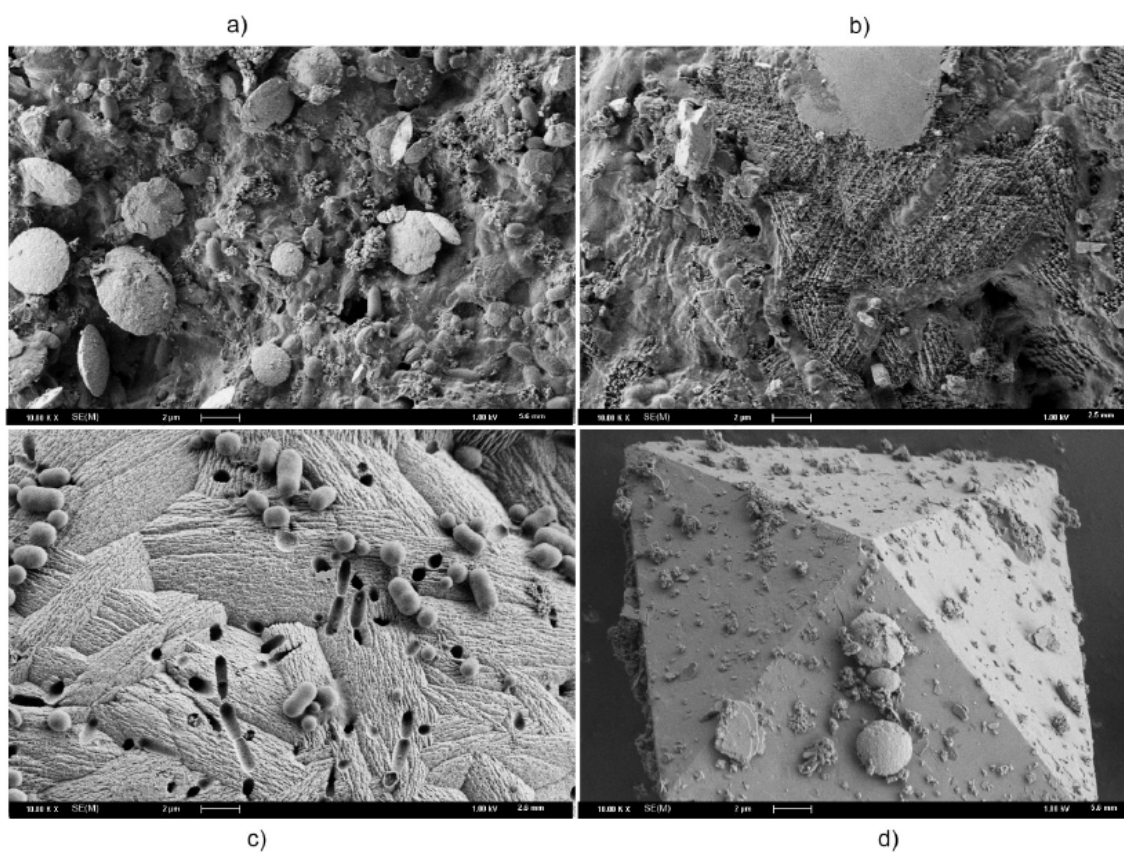

**Figure S2.** Representative scanning electron micrographs of CaCO<sub>3</sub> precipitates formed by some bacterial strains under study: (a) vaterite (ellipsoid particles) produced by *S. epidermidis* 4a in B4-AC medium; (b) calcite, *B. licheniformis* DSMZ 8782, B4-U medium; (c) vaterite, *B. subtilis* 170, B4-AC medium. Bacterial cells and imprints are seen on the surface of the crystal; (d) calcite (large faceted crystal) and vaterite (ellipsoid particles), *B. subtilis* 170, B4-AC medium.

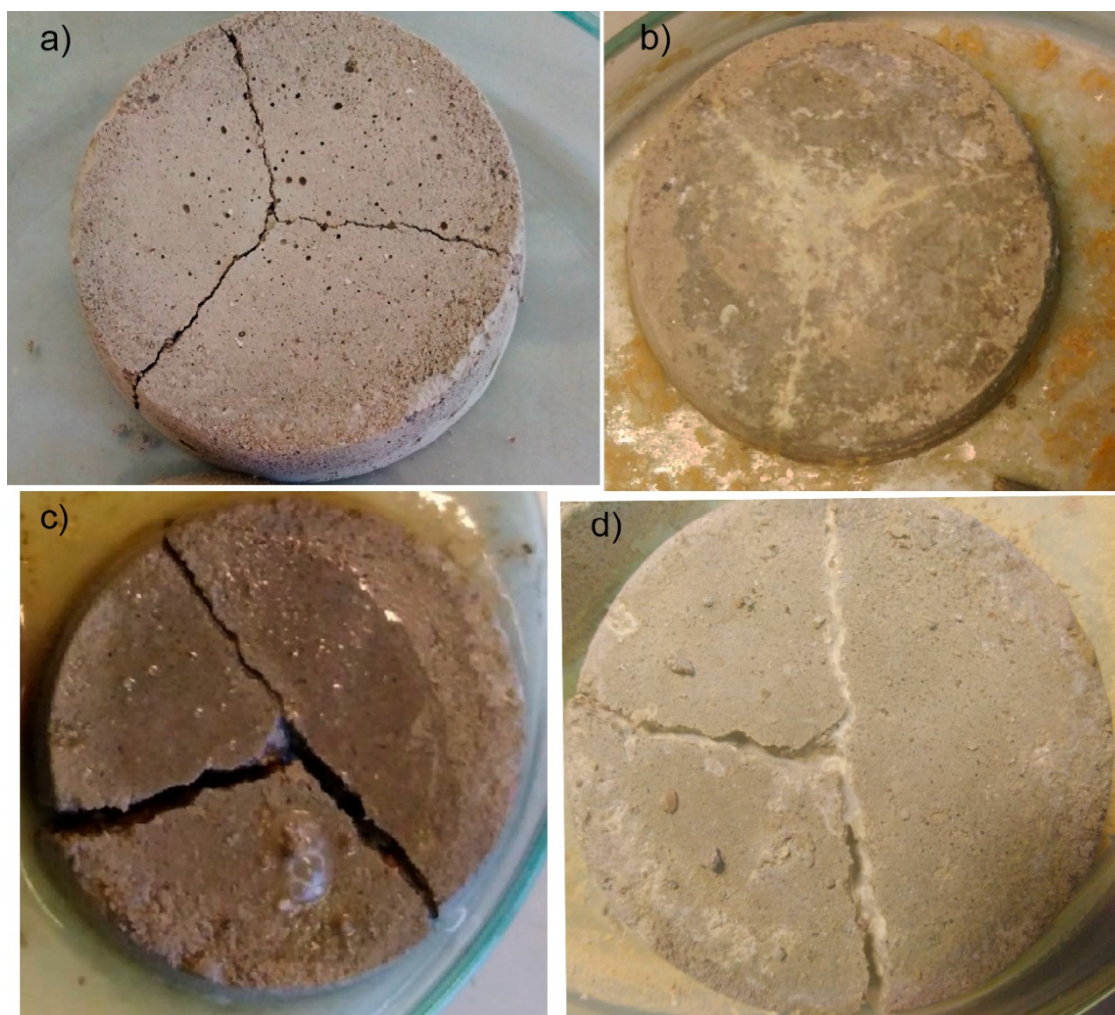

**Figure S3.** Typical micrographs of micro-crack filling by *B. licheniformis* DSMZ 8782 before (**a and c**) and after a month of the growth on the cement surface in B4-U medium (**a and b**) and in B4-AC medium (**c and d**).

**Publisher's Note:** MDPI stays neutral with regard to jurisdictional claims in published maps and institutional affiliations.

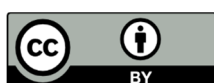

© 2020 by the authors. Licensee MDPI, Basel, Switzerland. This article is an open access article distributed under the terms and conditions of the Creative Commons Attribution (CC BY) license (<http://creativecommons.org/licenses/by/4.0/>).
